# Supplementary material for: Loss of CDKN1A mRNA and Protein Expression Are Independent Predictors of Poor Outcome in Chromophobe Renal Cell Carcinoma Patients
Source: PubMed Central journal article supplement (PMC7072616; doi:10.3390/cancers12020465), 2020-02-17

# Supplementary Materials: Loss of CDKN1A mRNA and Protein Expression are Independent Predictors of Poor Outcome in Chromophobe Renal Cell Carcinoma Patients

Riuko Ohashi, Silvia Angori, Aashil A. Batavia, Niels J. Rupp, Yoichi Ajioka, Peter Schraml and Holger Moch

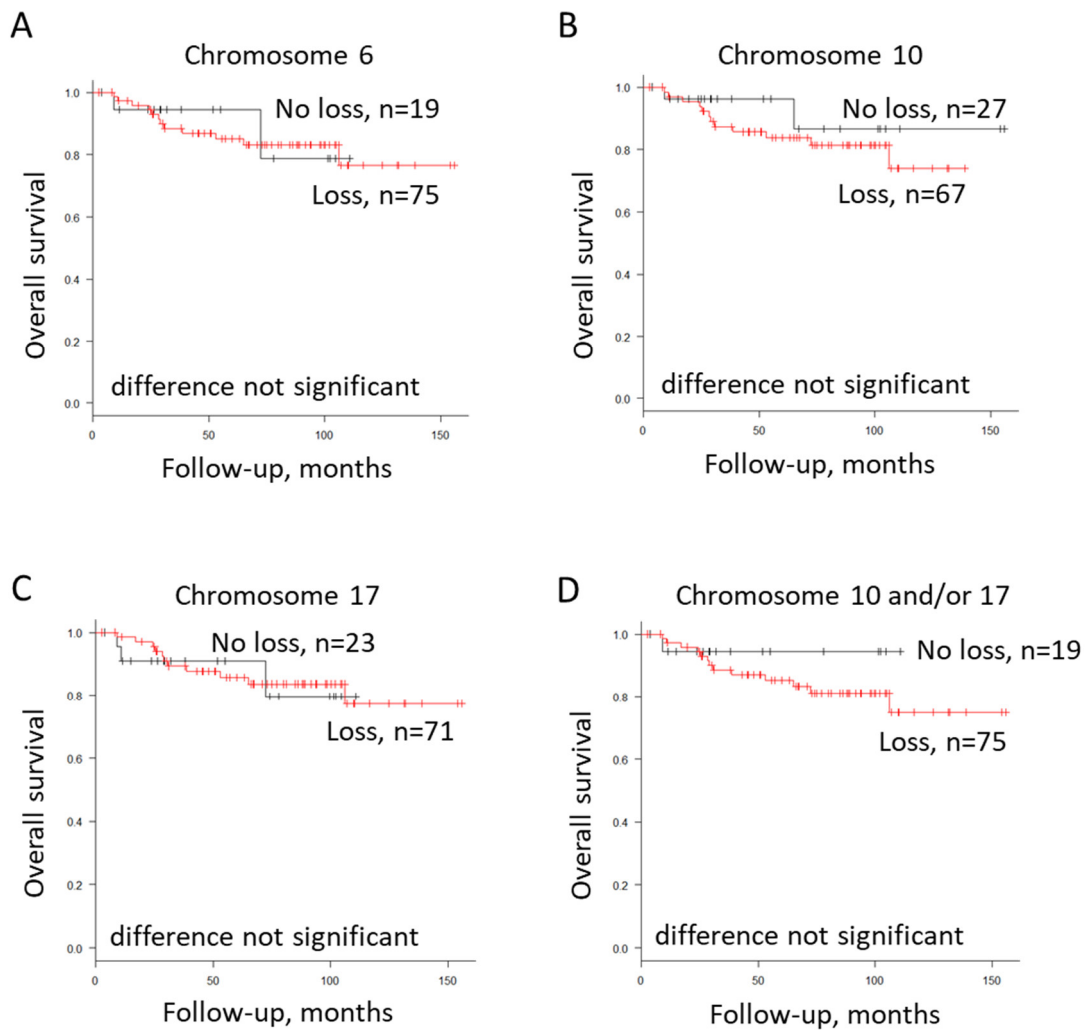

**Figure S1.** Loss of chromosome 6 harboring *CDKN1A* (A), chromosome 10 harboring *PTEN* (B), chromosome 17 harboring *TP53* (C), combined loss of chromosome 10 and 17 (D) and patient overall survival in chRCC.

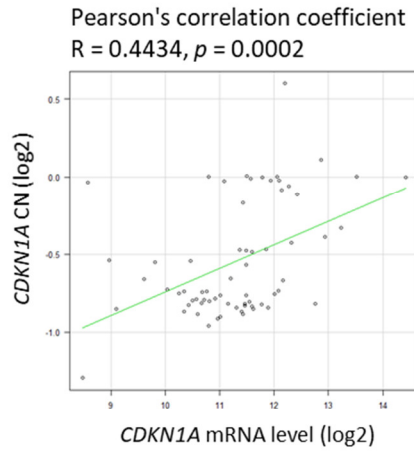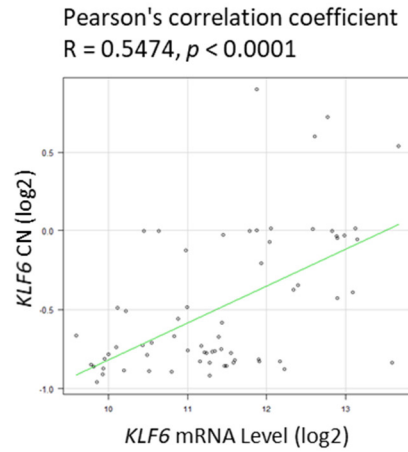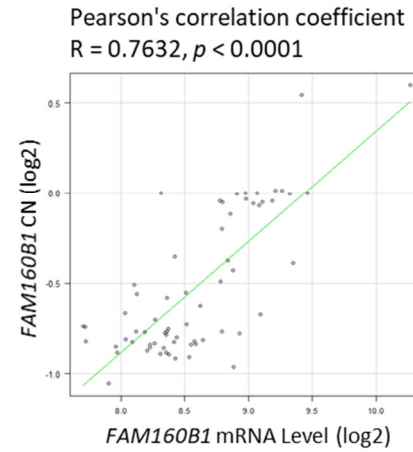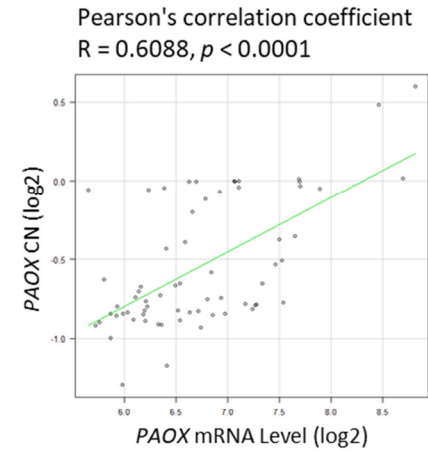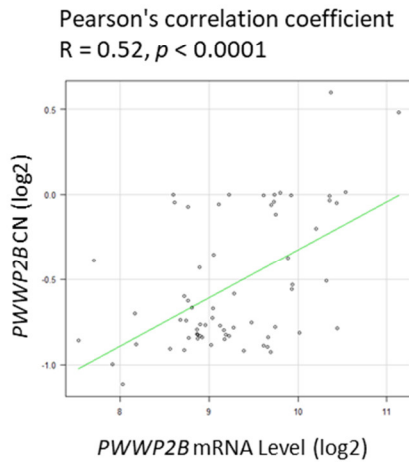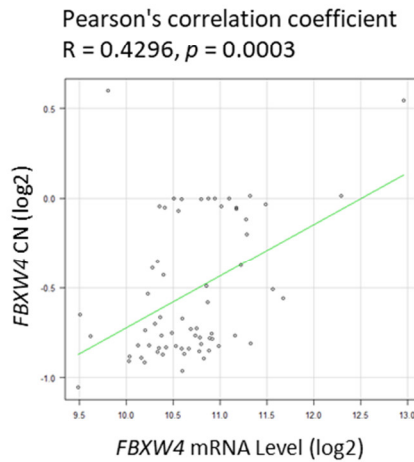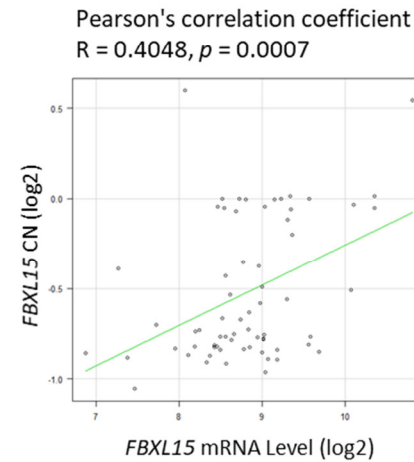

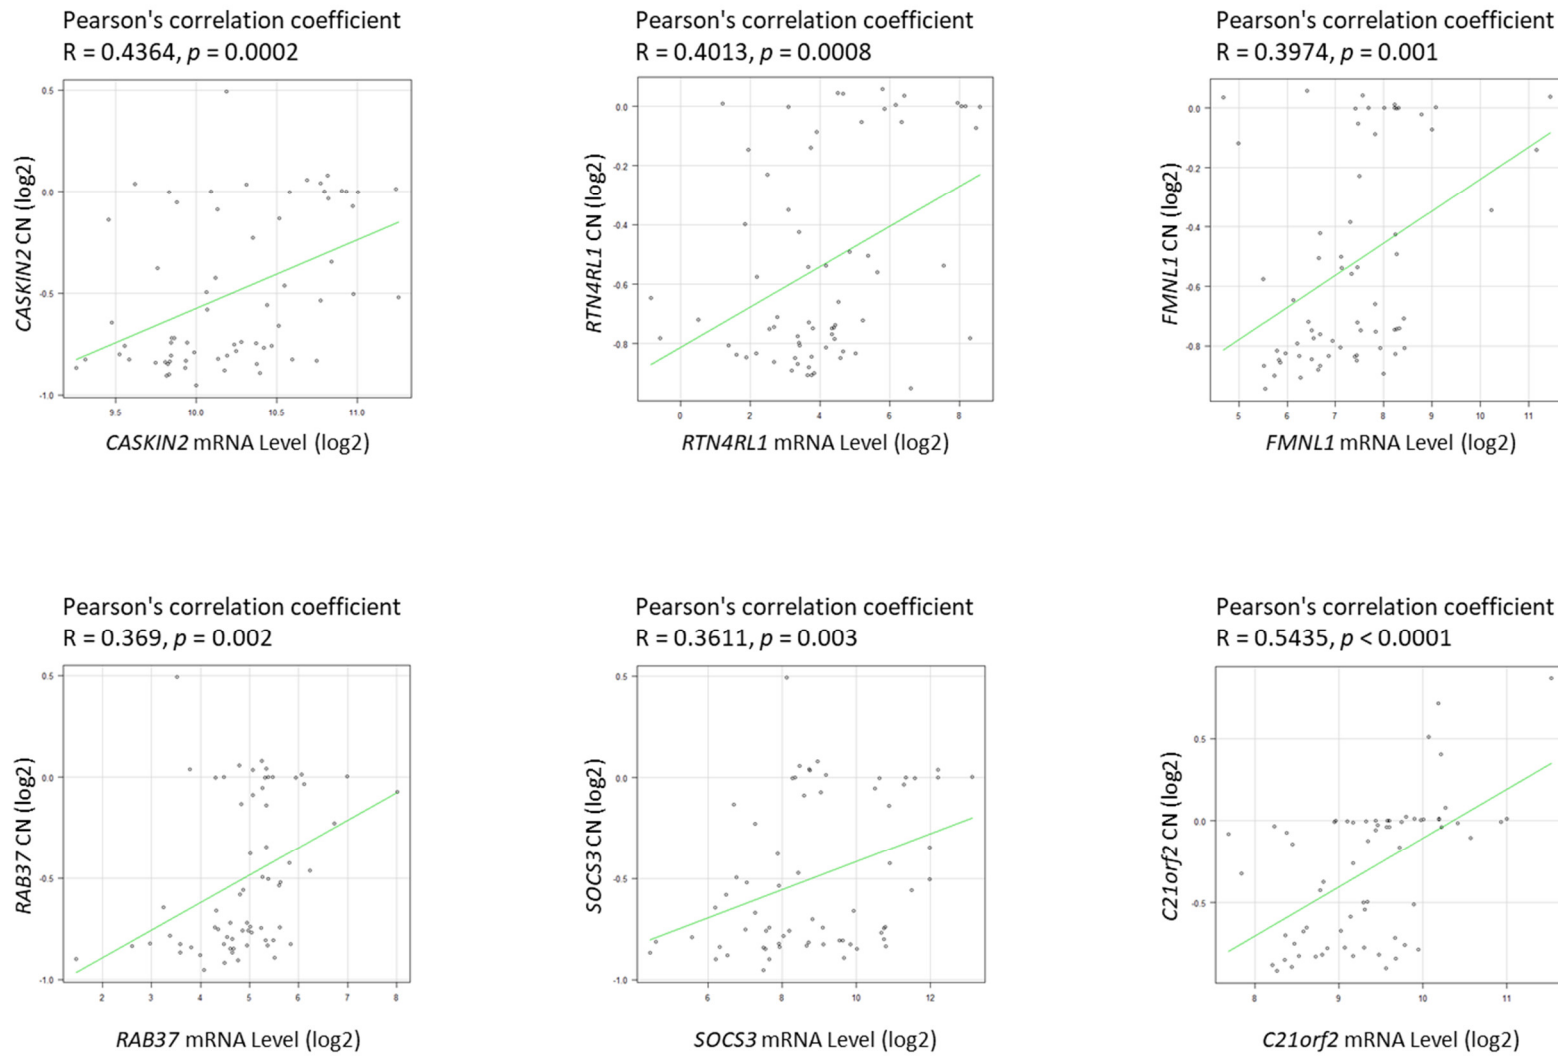

**Figure S2.** Correlation between CN loss and mRNA expression levels of 13 genes.

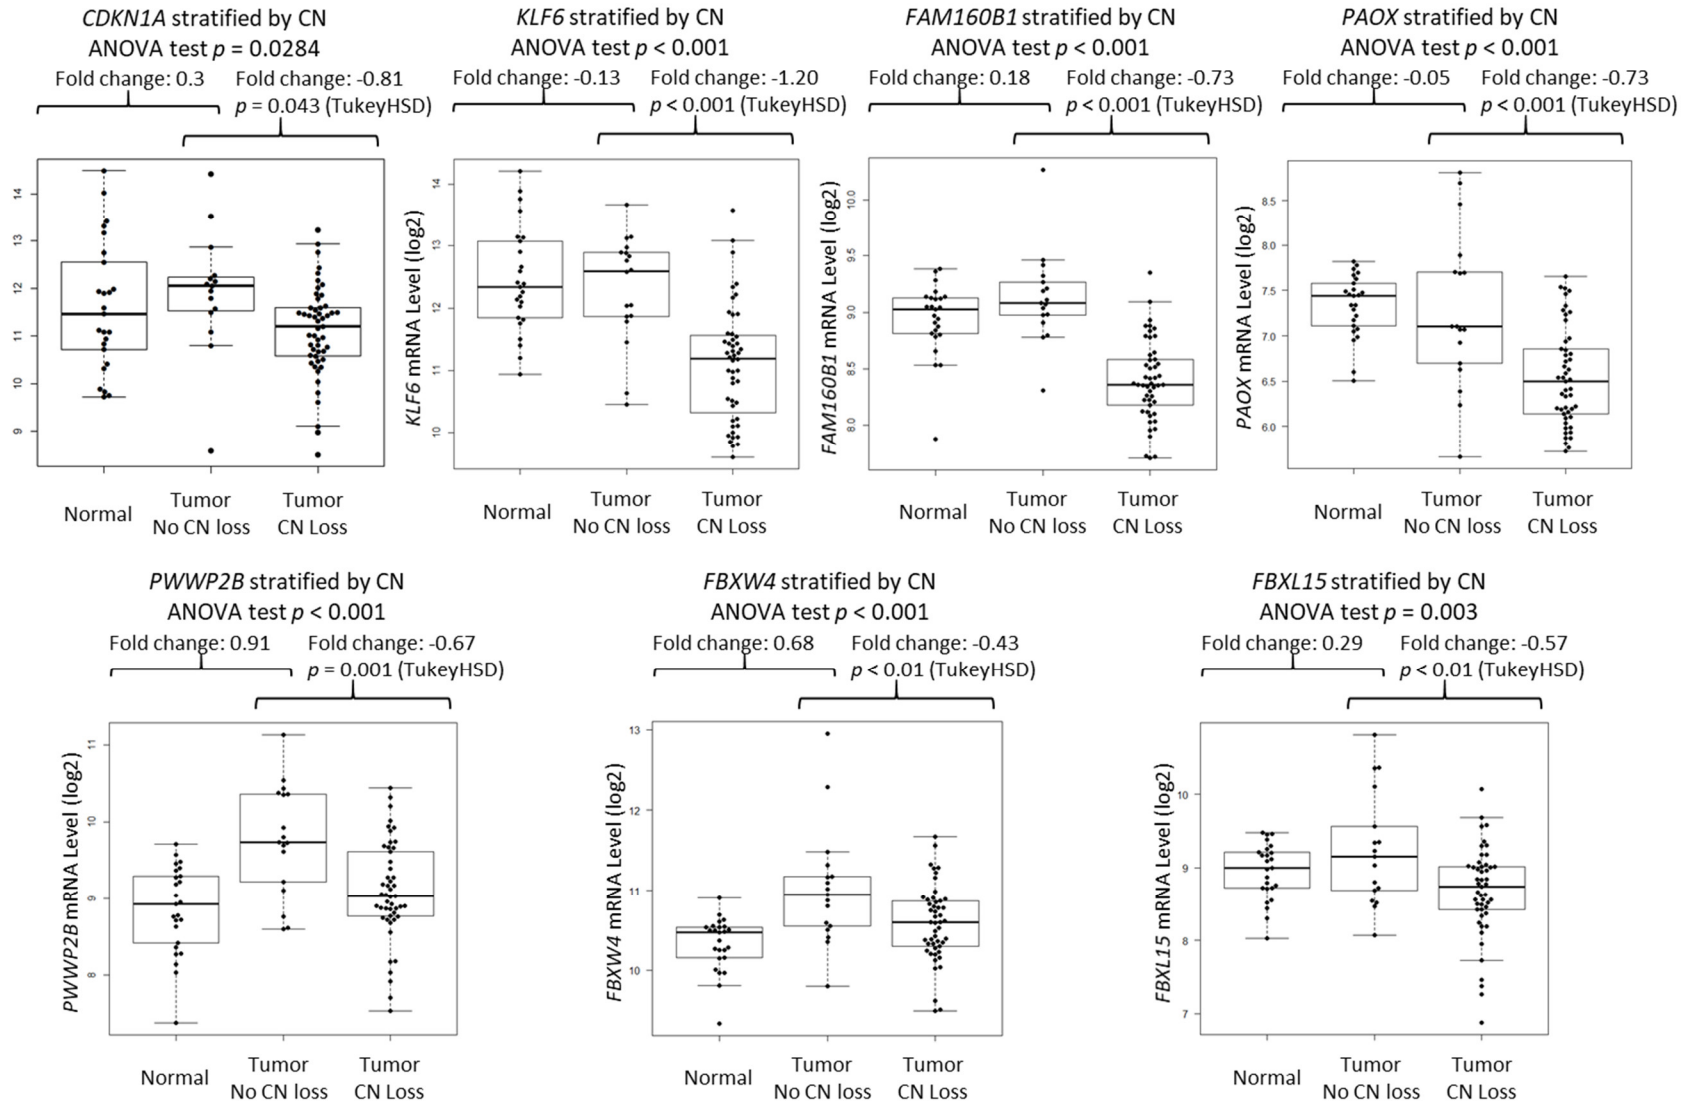

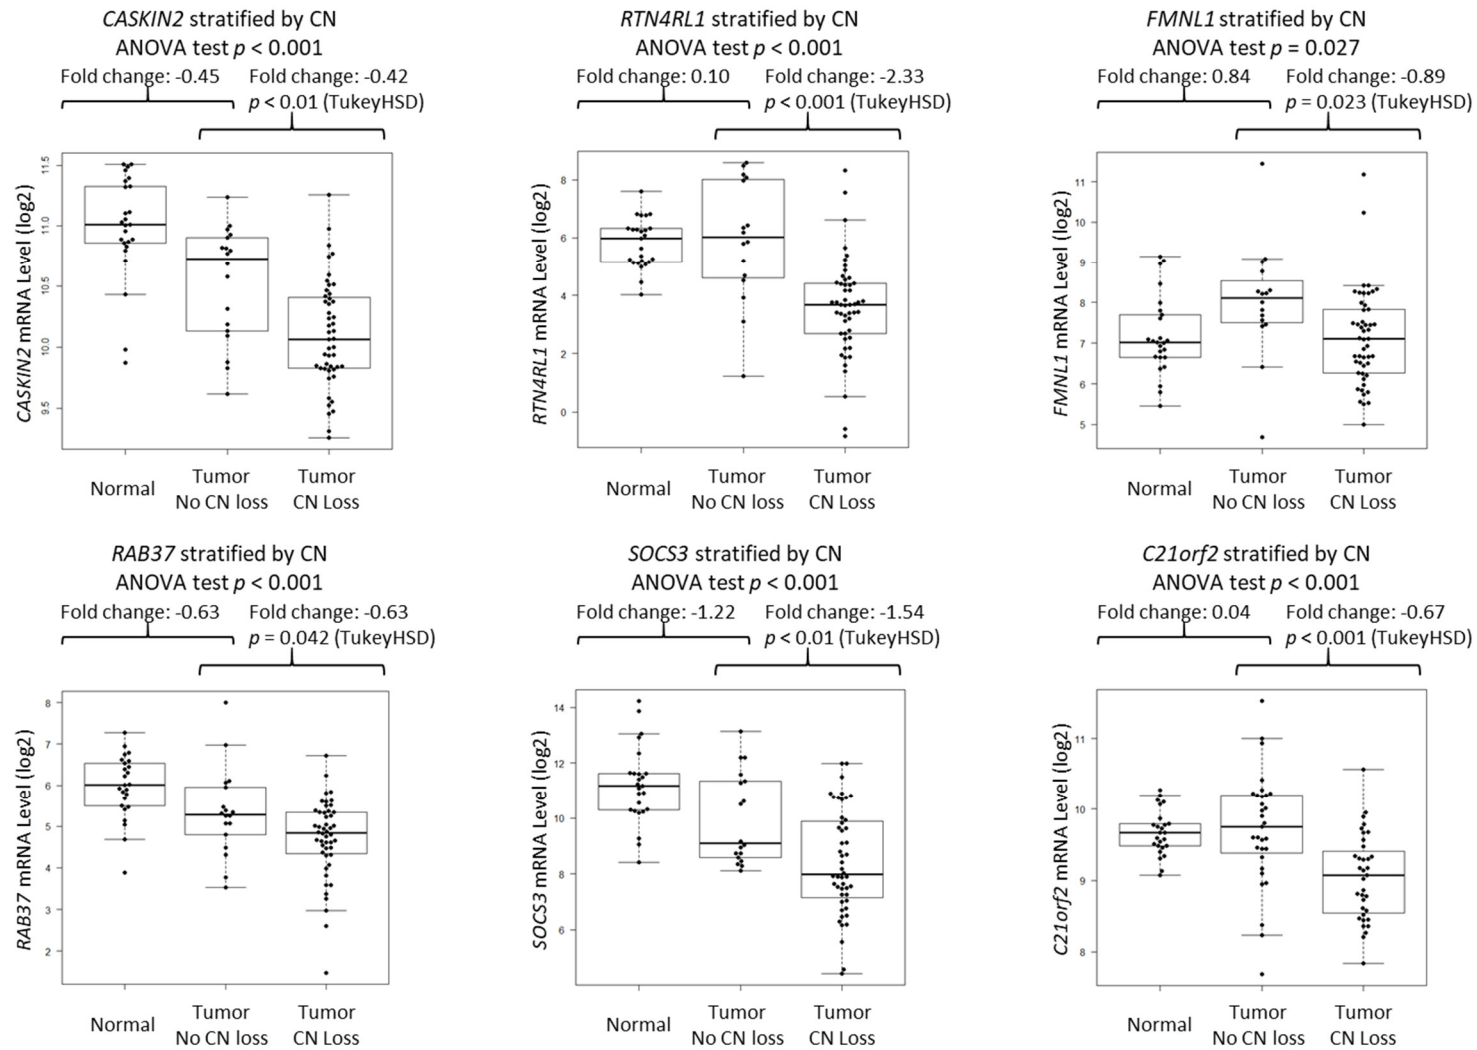

**Figure S3.** Scatter plots showing the correlation between mRNA expression and copy number variation of the 13 genes using the TCGA-KICH dataset. Dotted line: log<sub>2</sub> threshold at -0.1 between CN loss and no loss.

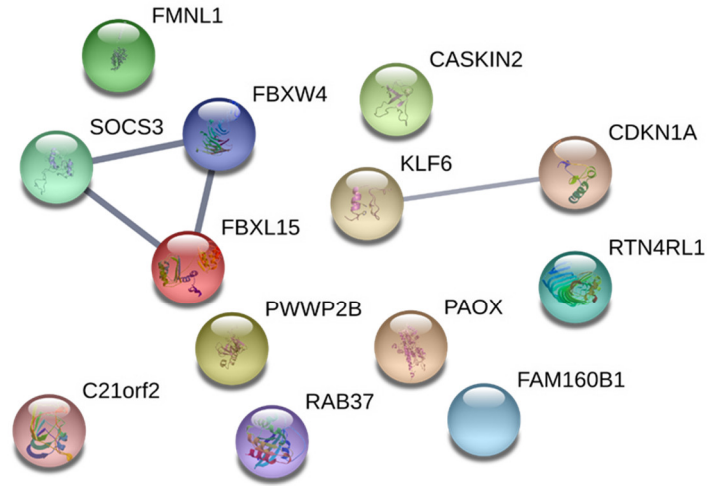

STRING undirected interaction network of 13 genes.

Figure S4. Protein-protein interactions between the 13 gene products using STRING database.

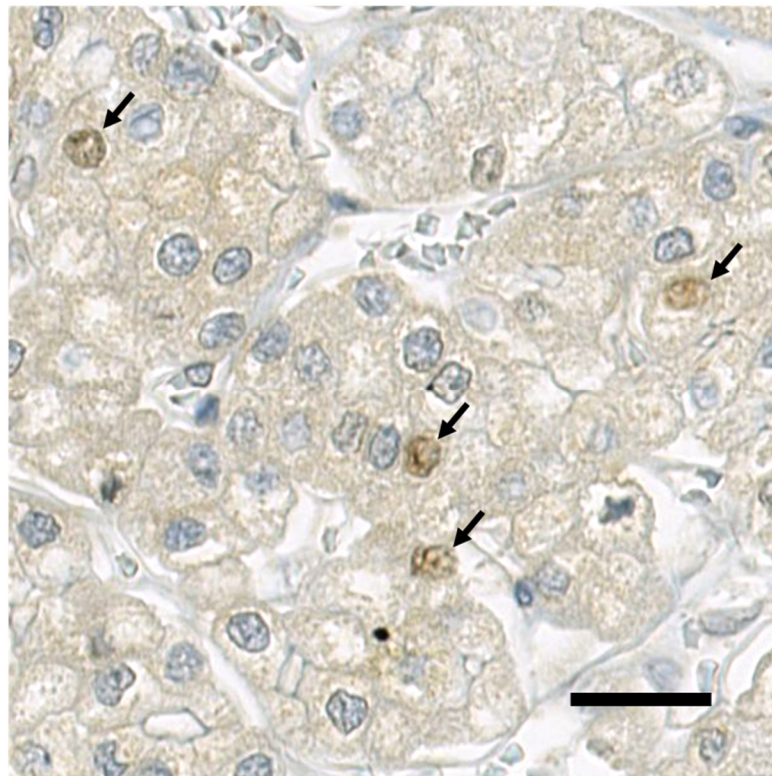

Figure S5. CDKN1A positive chRCC with weakly stained tumor cell nuclei (black arrows). Bar: 20  $\mu$ m.

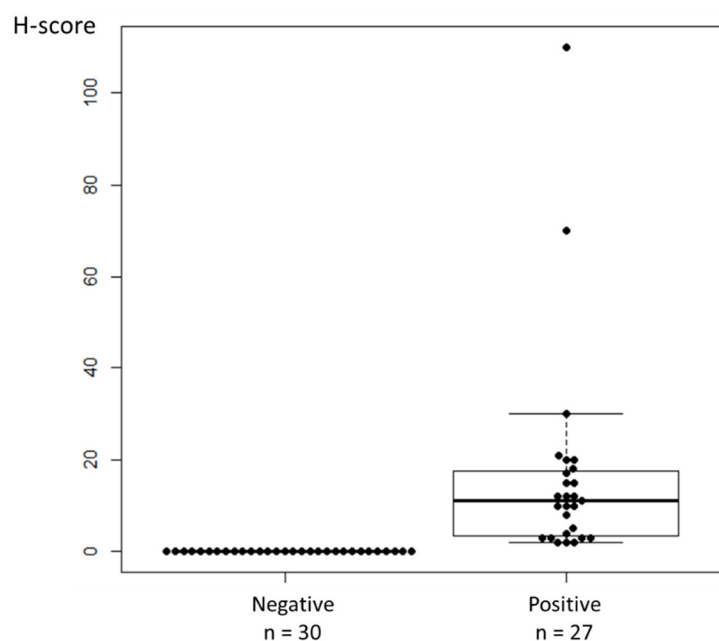

**Figure S6.** Distribution of CDKN1A H-scores of chRCCs by immunohistochemistry.

**Table S1.** Frequency of chromosomal loss in 2 chRCC cohorts.

| Cohort        | Swiss cohort (n = 30) | TCGA-KICH (n = 64) |
|---------------|-----------------------|--------------------|
| Loss          | n (%)                 | n (%)              |
| Chromosome 2  | 22 (73.3)             | 47 (73.4)          |
| Chromosome 6  | 25 (83.3)             | 50 (78.1)          |
| Chromosome 10 | 19 (63.3)             | 48 (75.0)          |
| Chromosome 13 | 21 (70.0)             | 43 (67.2)          |
| Chromosome 17 | 23 (76.7)             | 48 (75.0)          |
| Chromosome 21 | 17 (56.7)             | 33 (51.6)          |

**Table S2.** Genes with correlation of expression levels, median and best separation cutoffs, and survival (Data from Human Protein Atlas database).

| Gene     | Median Cut Off | Expression Level Range |                 |         | Best Separation Cut Off | Expression Level Range |                 | p value |
|----------|----------------|------------------------|-----------------|---------|-------------------------|------------------------|-----------------|---------|
|          |                | low (N)                | high (N)        | p value |                         | Low (N)                | High (N)        |         |
| CDKN1A   | 34.63          | 5.1–34.3 (32)          | 35.0–328.8 (32) | 0.026   | 27.19                   | 5.1–26.8 (25)          | 27.6–328.8 (39) | 0.02    |
| KLF6     | 18.64          | 5.2–18.6 (32)          | 18.7–101.7 (32) | n.s.    | 22.55                   | 5.2–22.5 (40)          | 22.6–101.7 (24) | 0.043   |
| FAM160B1 | 2.5            | 1.1–2.5 (32)           | 2.6–9.2 (32)    | n.s.    | 2.83                    | 1.1–2.8 (40)           | 2.9–9.2 (24)    | 0.037   |
| PAOX     | 1.86           | 1.0–1.8 (32)           | 1.9–9.7 (32)    | n.s.    | 1.54                    | 1.0–1.5 (19)           | 1.6–9.7 (45)    | 0.017   |
| PWWP2B   | 9.26           | 3.6–8.9 (32)           | 9.3–35.2 (32)   | n.s.    | 9.37                    | 3.6–9.3 (34)           | 9.5–35.2 (30)   | 0.0039  |
| FBXW4    | 14.06          | 6.6–13.9 (32)          | 14.1–66.8 (32)  | 0.021   | 13.23                   | 6.6–13.1 (26)          | 13.4–66.8 (38)  | 0.0031  |
| FBXL15   | 7.84           | 2.2–7.7 (32)           | 8.0–31.9 (32)   | n.s.    | 5.95                    | 2.2–5.9 (13)           | 6.0–31.9 (51)   | 0.0067  |
| CASKIN2  | 8.23           | 4.7–8.2 (32)           | 8.6–21.4 (32)   | n.s.    | 6.96                    | 4.7–6.9 (17)           | 7.0–21.4 (47)   | 0.026   |
| RTN4RL1  | 0.16           | 0.0–0.2 (32)           | 0.2–4.9 (32)    | n.s.    | 0.08                    | 0.0–0.1 (16)           | 0.1–4.9 (48)    | 0.015   |
| FMNL1    | 1.06           | 0.1–1.0 (32)           | 1.1–18.5 (32)   | n.s.    | 0.97                    | 0.1–0.9 (34)           | 1.0–18.5 (30)   | 0.044   |
| RAB37    | 0.25           | 0.0–0.2 (32)           | 0.2–1.7 (32)    | n.s.    | 0.22                    | 0.0–0.2 (26)           | 0.2–1.7 (38)    | 0.019   |
| SOCS3    | 6.04           | 0.4–5.7 (32)           | 6.4–155.3 (32)  | n.s.    | 6.6                     | 0.4–6.5 (35)           | 6.7–155.3 (29)  | 0.031   |
| C21orf2  | 3.88           | 1.2–3.8 (32)           | 3.9–15.2 (32)   | n.s.    | 3.73                    | 1.2–3.7 (29)           | 3.8–15.2 (35)   | 0.026   |

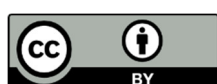

Supplement: cancers-12-00465-s001.pdf [file cancers-12-00465-s001.pdf]
